# Supplementary material
Source: MDPI journal article supplement (https://www.mdpi.com/2218-0532/91/4/47)
Supplement: s1 [file s1]

## Neuropharmacological activity of the acetonic extract of *Malpighia mexicana* A. Juss. and its phytochemical profile

Dante Avilés-Montes, David Osvaldo Salinas-Sánchez\*, César Sotelo-Leyva, Alejandro Zamilpa, Franceli Itzel Batalla-Martinez, Rodolfo Abarca-Vargas, Juan Manuel Rivas-González, Óscar Dorado, Rodolfo Figueroa-Brito, Vera L. Petricevich, Dulce Lourdes Morales-Ferra, and Manasés González-Cortazar \*

### UPLC, Gas Chromatography and Mass Spectrometry Data

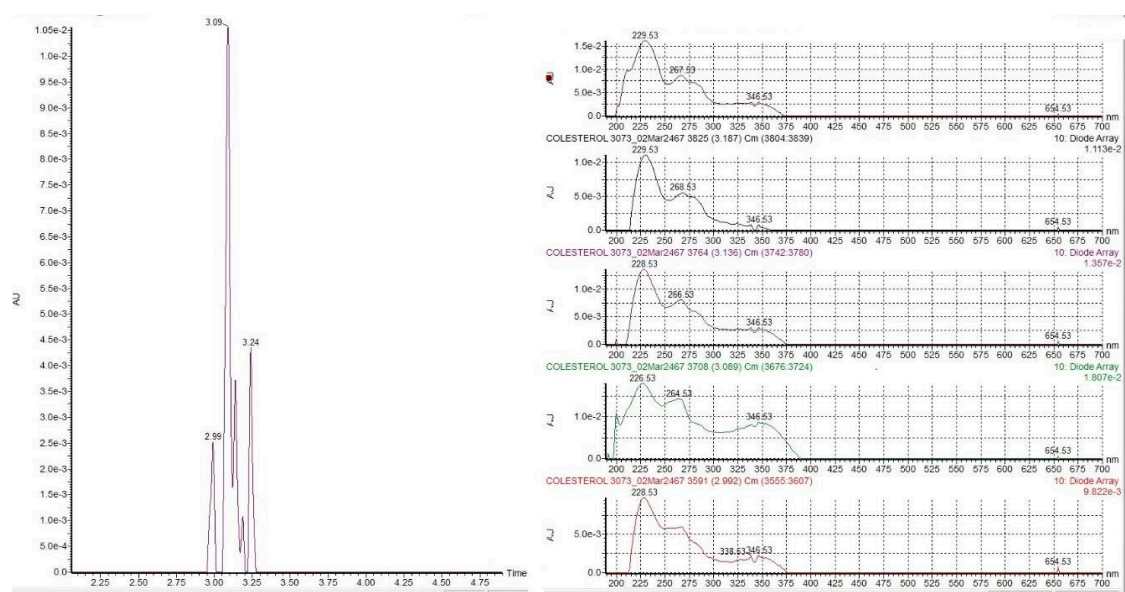

Figure S1: UPLC chromatogram and UV spectra of F14.

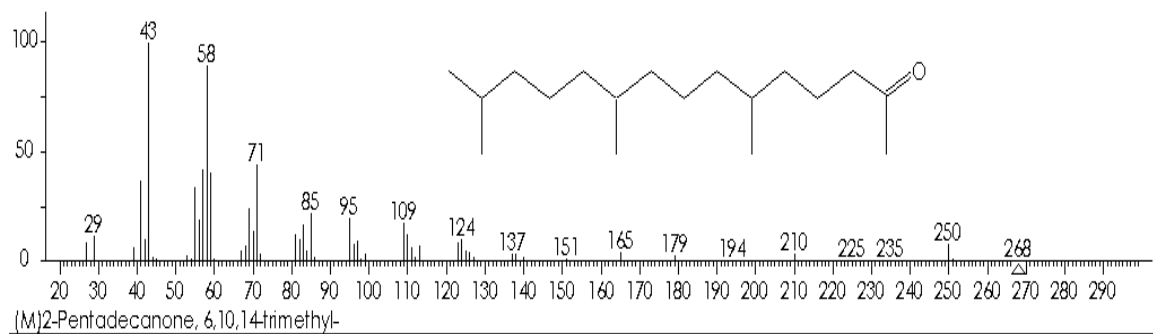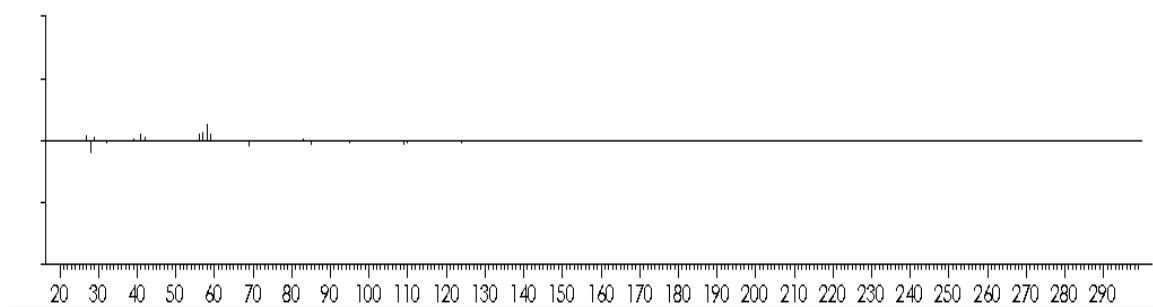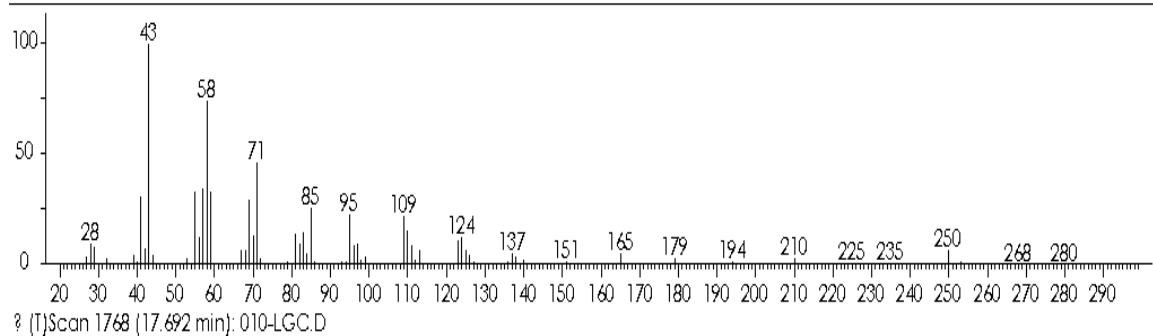

Figure S2: MS data of peak 1 identified in F3.

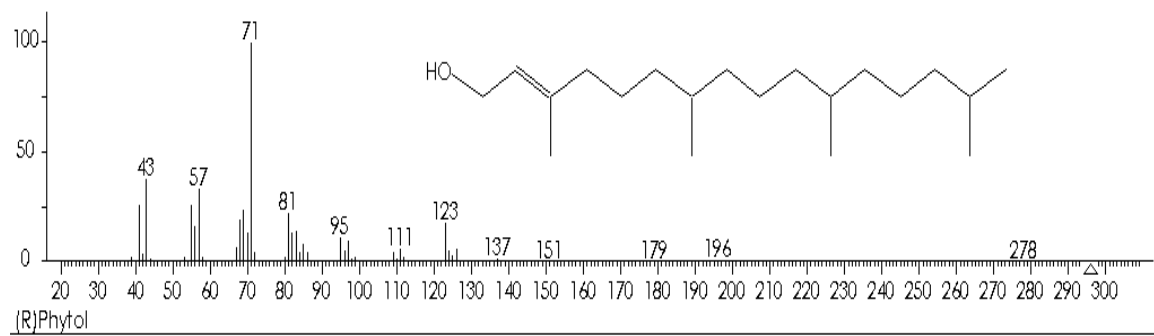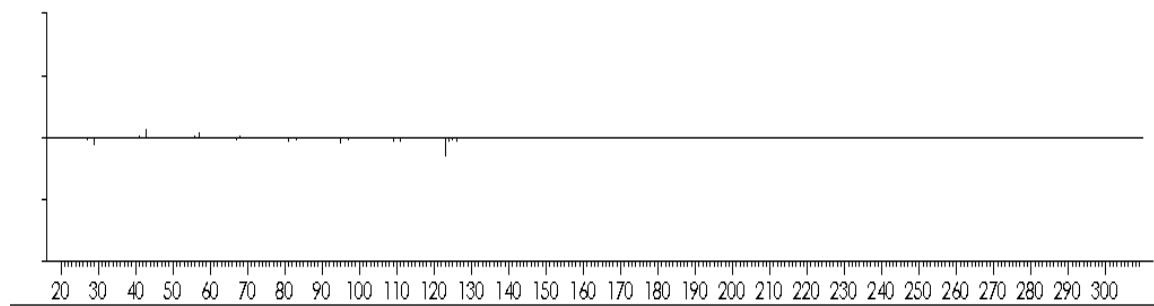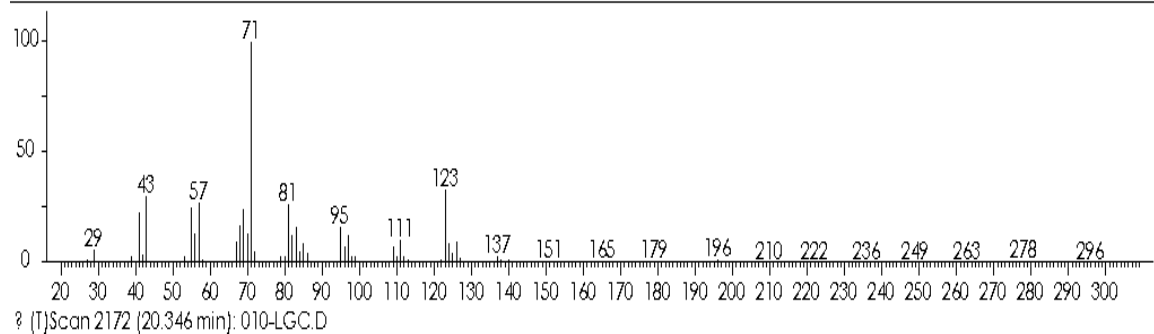

Figure S3: MS data of peak 2 identified in F3.

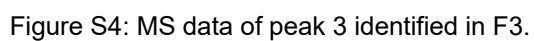

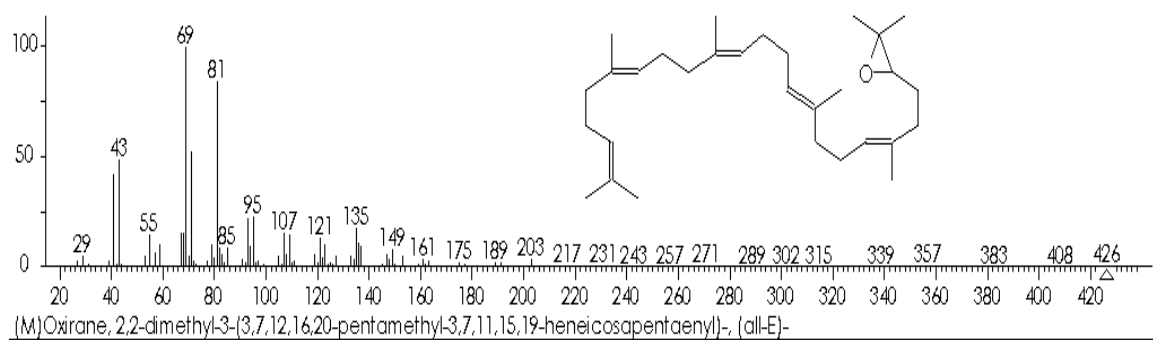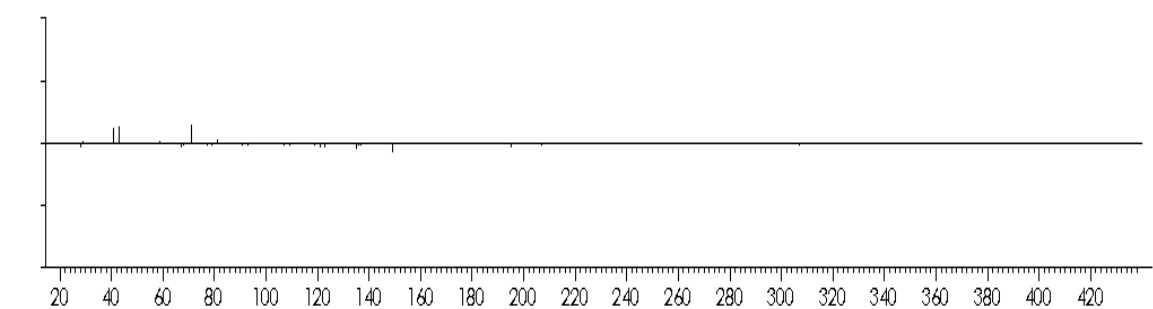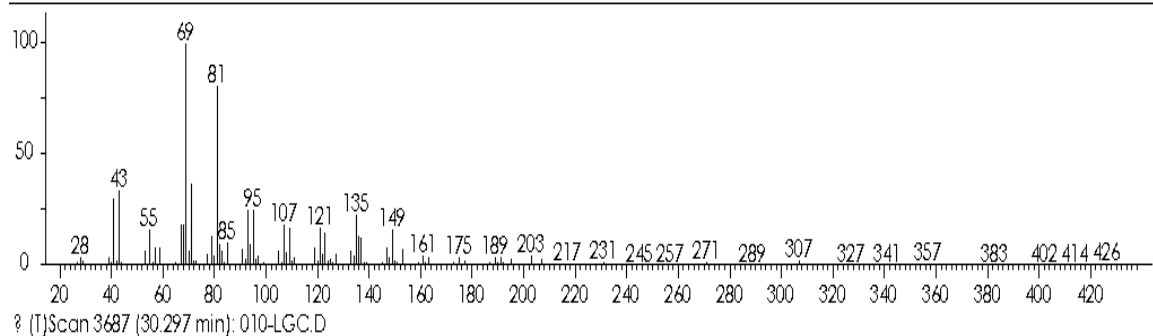

Figure S5: MS data of peak 4 identified in F3.

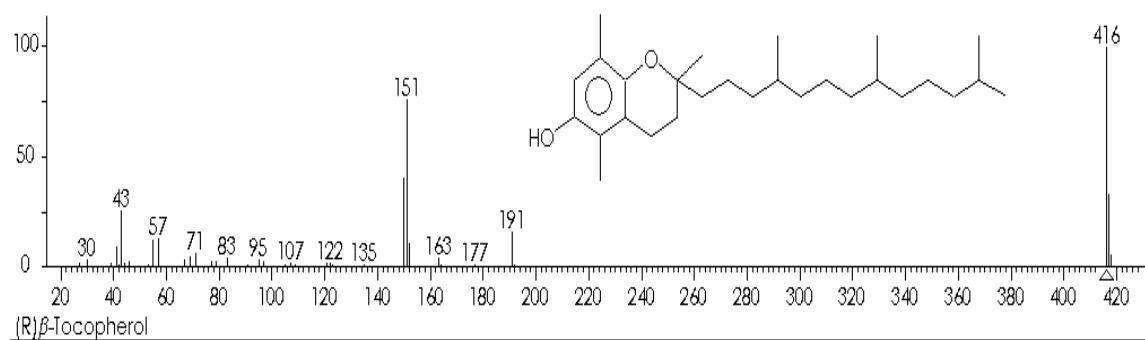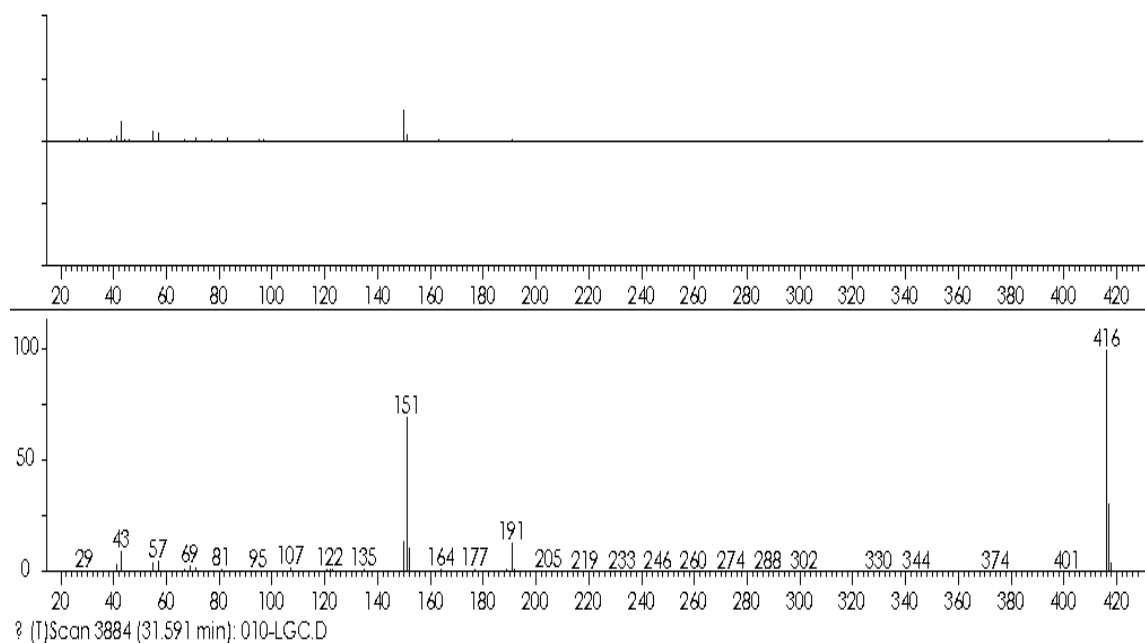

Figure S6: MS data of peak 5 identified in F3.

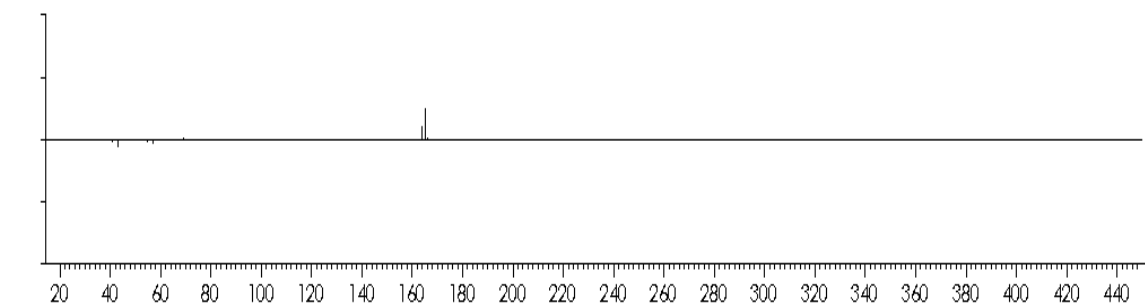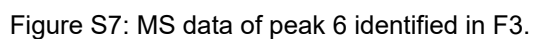

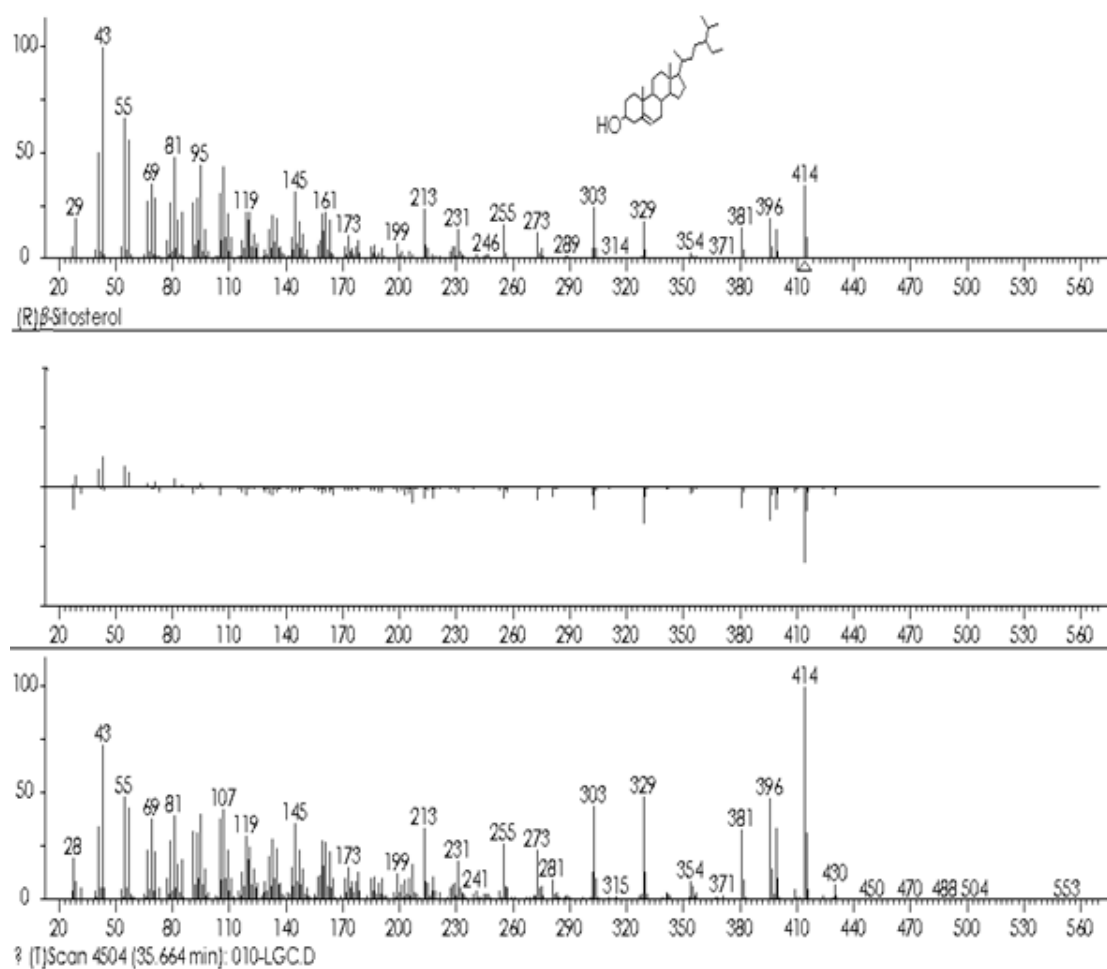

Figure S8: MS data of peak 7 identified in F3.



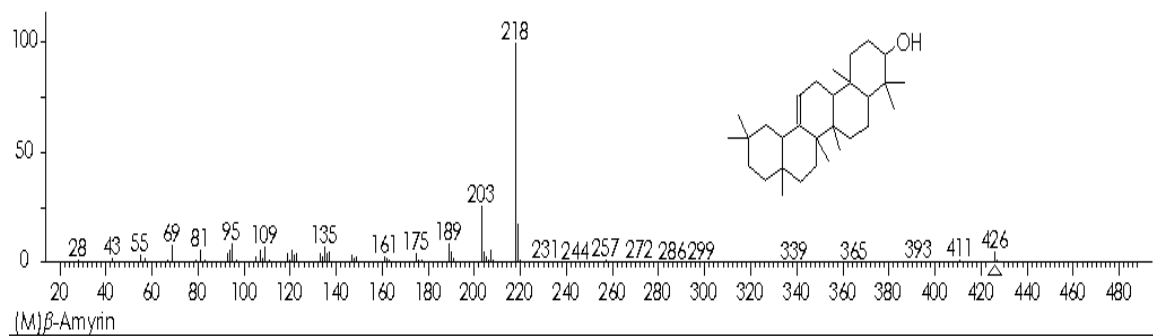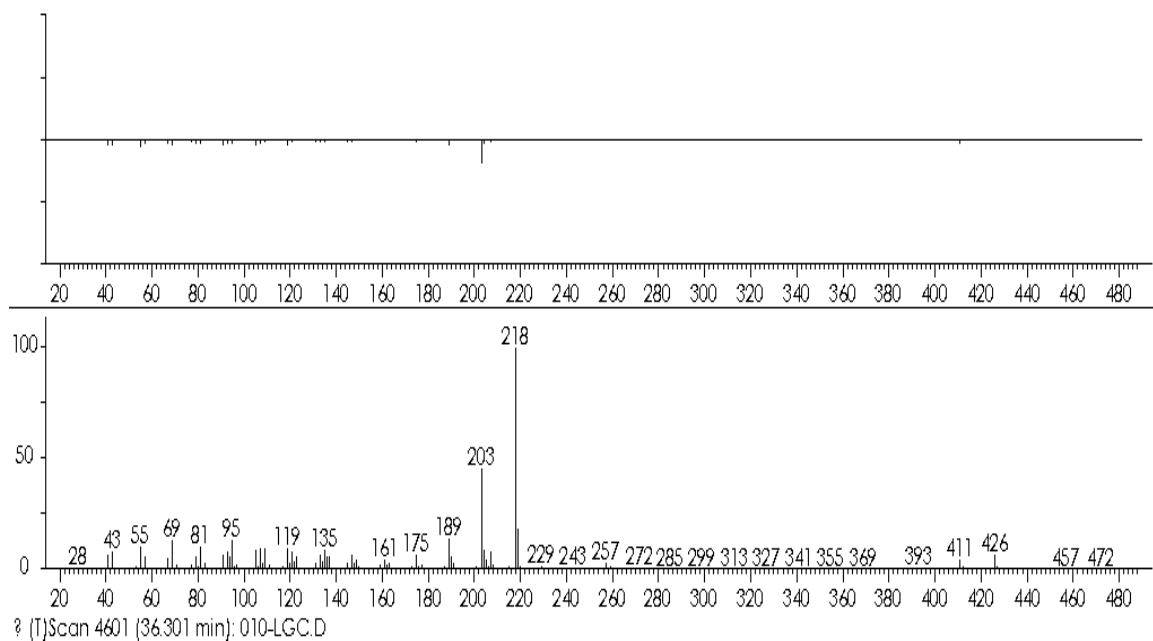

Figure S9: MS data of peak 8 identified in F3.

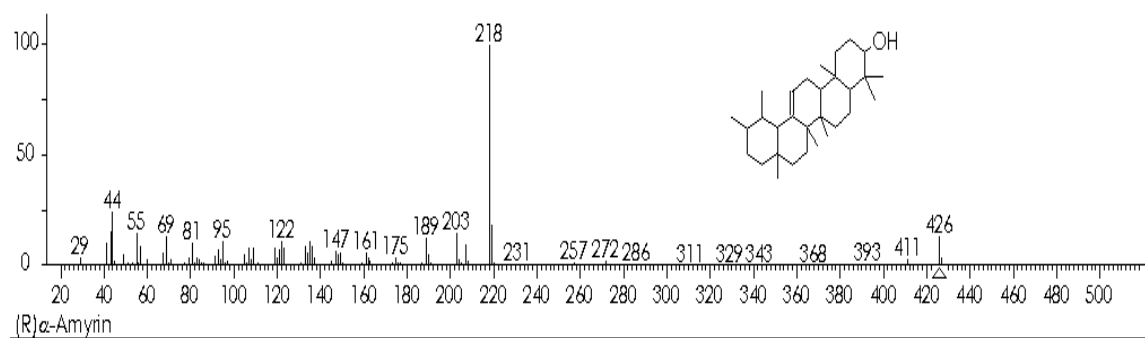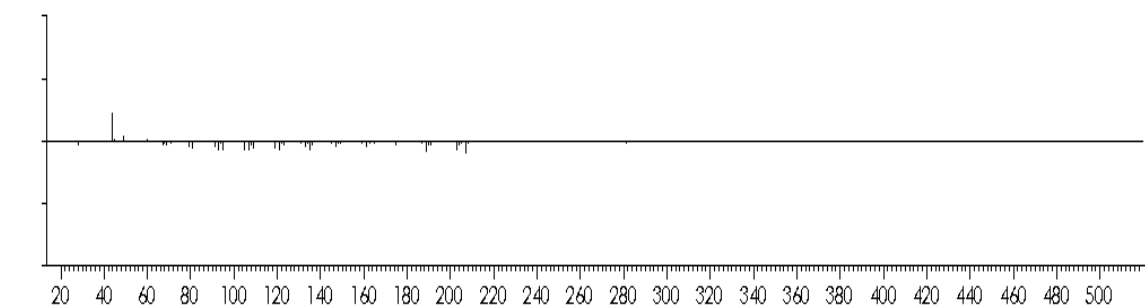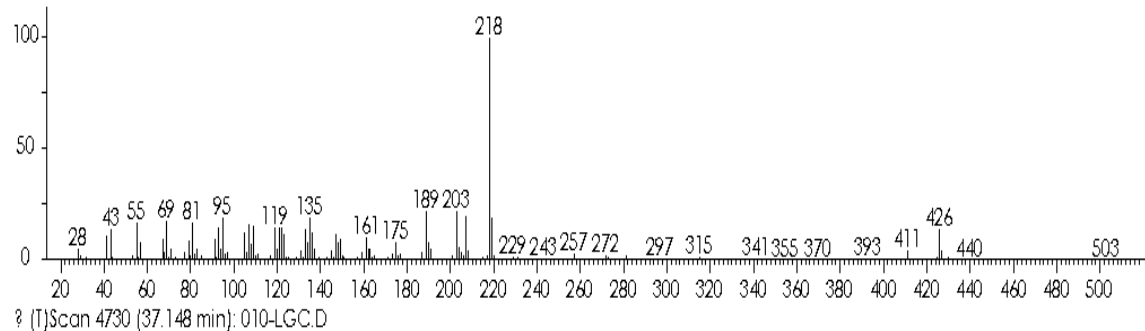

Figure S10: MS data of peak 9 identified in F3.

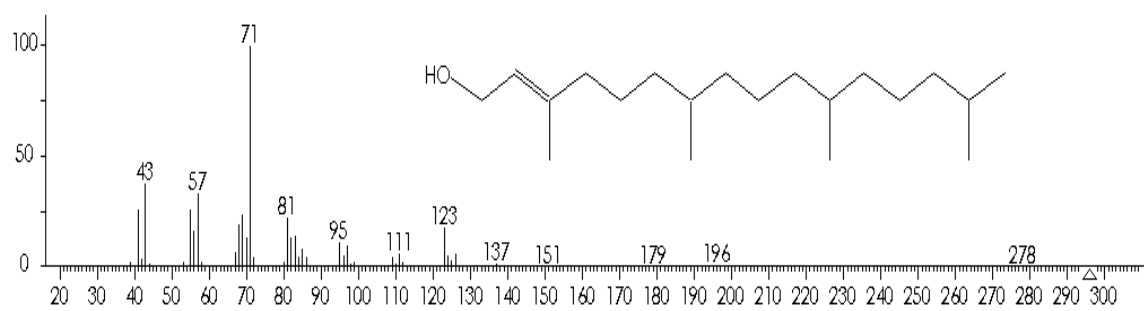

(R)-Phytol

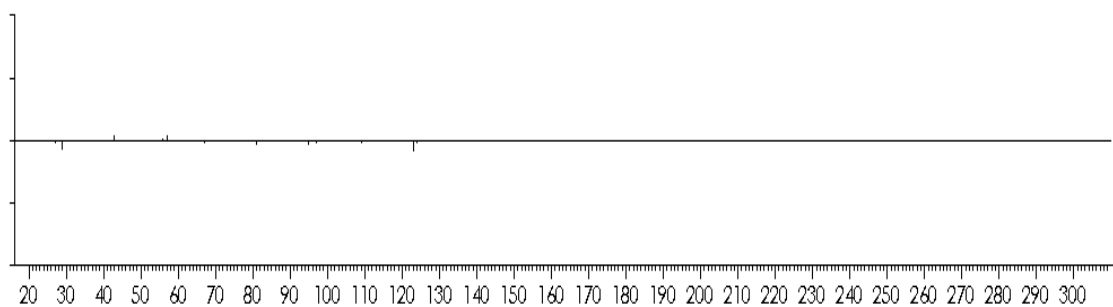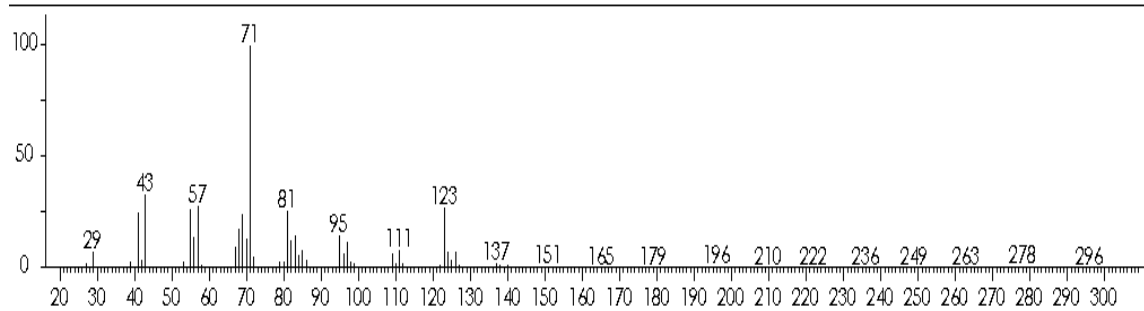

? (T)Scan 2166 (20.306 min): 008-LGC.D

Figure S11: MS data of peak 1 identified in F4-10.

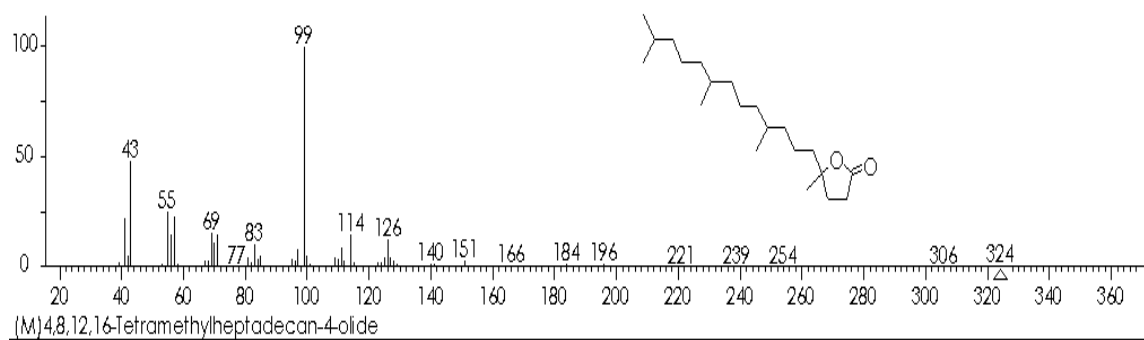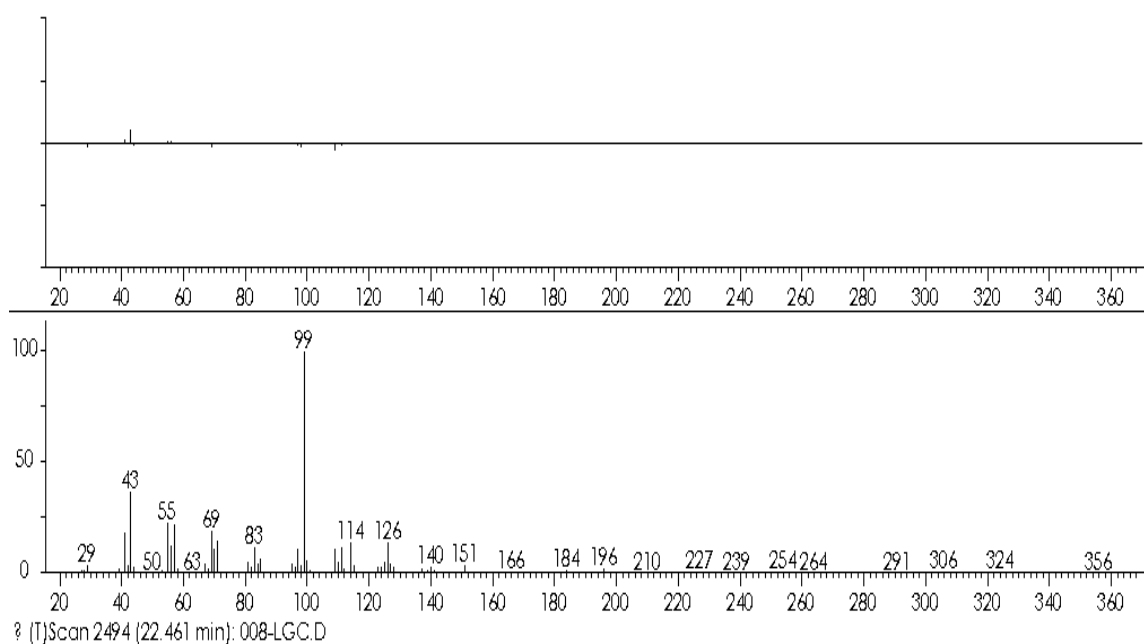

Figure S12: MS data of peak 2 identified in F4-10.

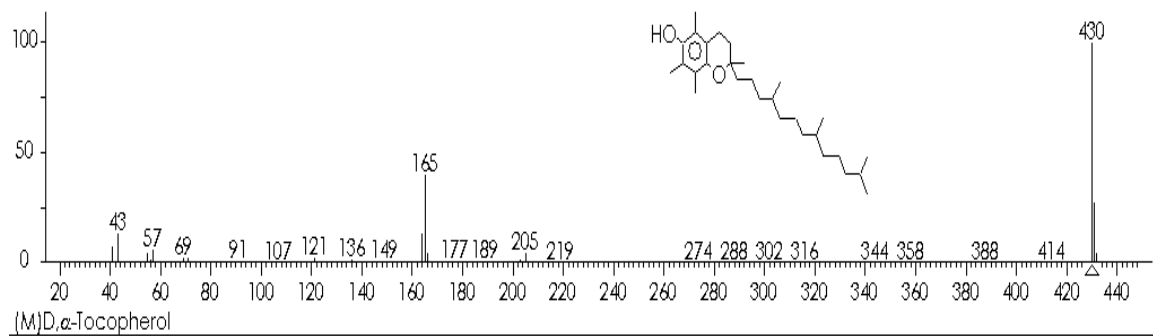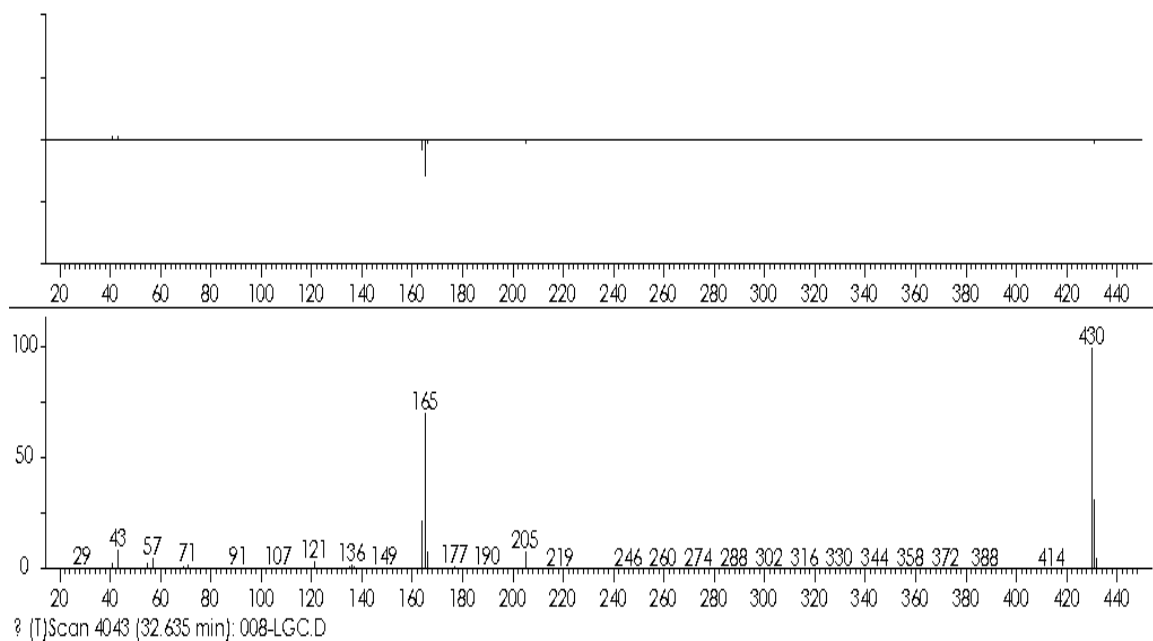

Figure S13: MS data of peak 3 identified in F4-10.

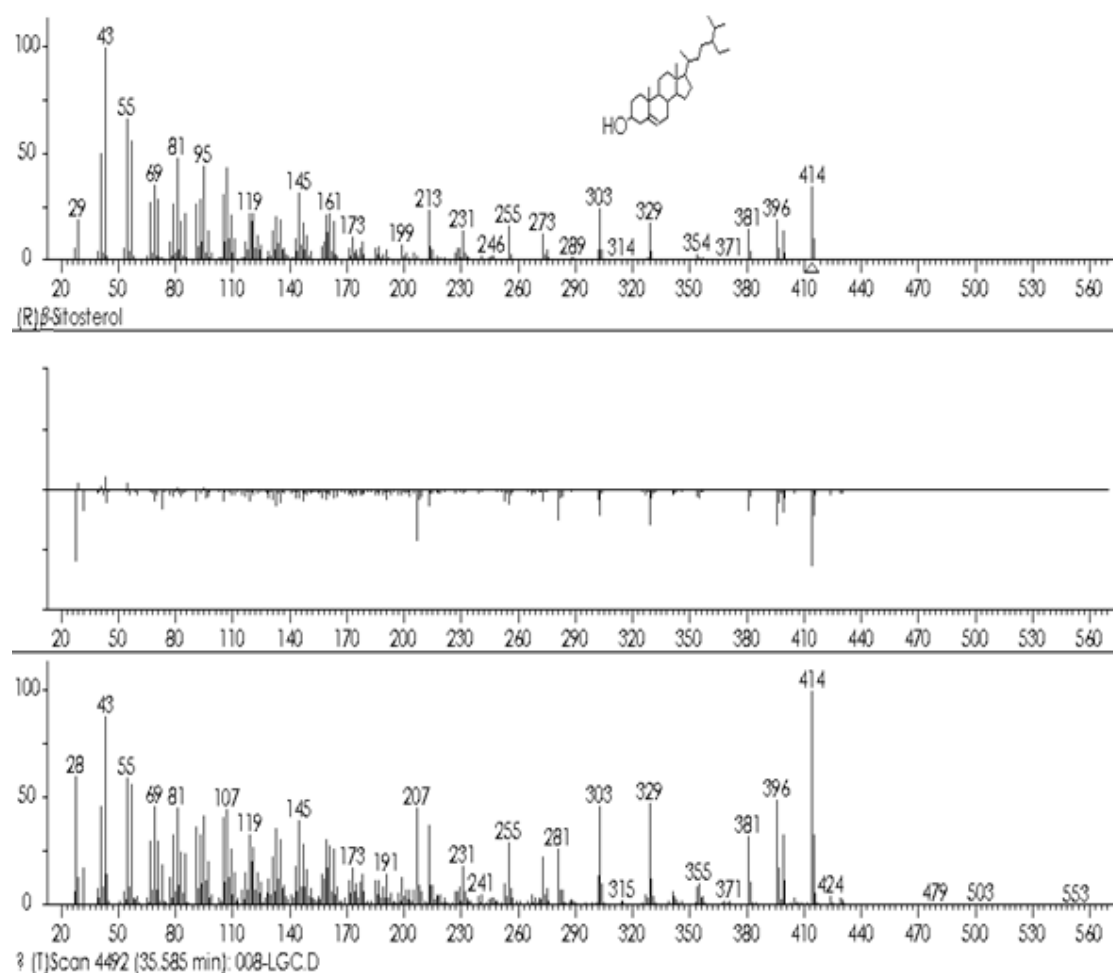

Figure S14: MS data of peak 4 identified in F4-10.

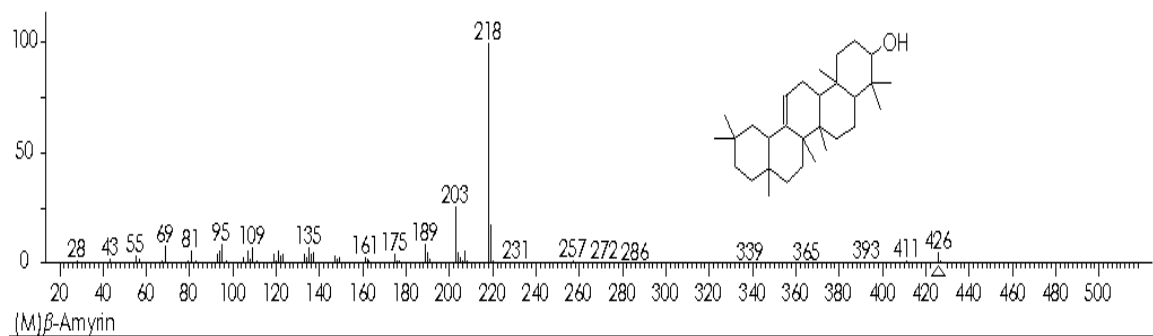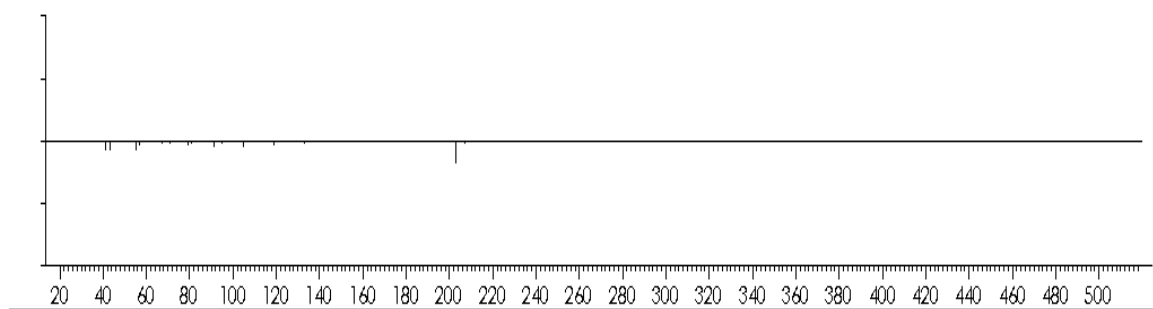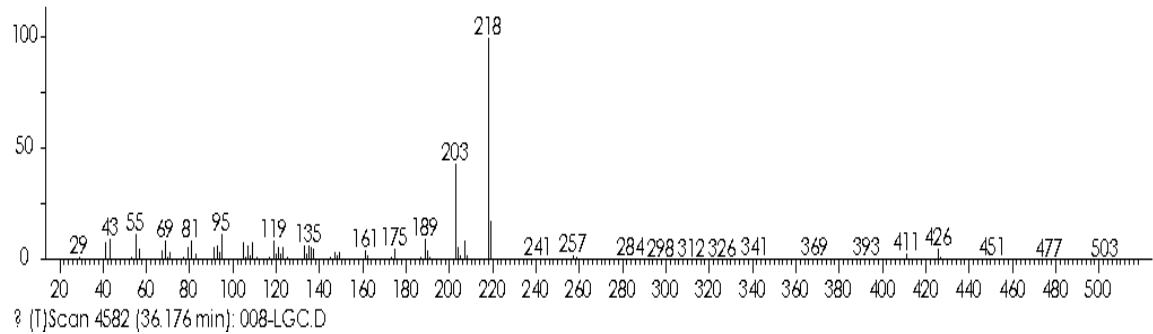

Figure S15: MS data of peak 5 identified in F4-10.

[illegible]



|                   |             |                   |  |  |  |  |  |  |  |  |  |  |  |  |  |  |  |  |  |  |  |  |  |
|-------------------|-------------|-------------------|--|--|--|--|--|--|--|--|--|--|--|--|--|--|--|--|--|--|--|--|--|
|                   | Muscle tone | Limb tone         |  |  |  |  |  |  |  |  |  |  |  |  |  |  |  |  |  |  |  |  |  |
|                   |             | Body tone         |  |  |  |  |  |  |  |  |  |  |  |  |  |  |  |  |  |  |  |  |  |
|                   | Reflexes    | Corneal reflex    |  |  |  |  |  |  |  |  |  |  |  |  |  |  |  |  |  |  |  |  |  |
|                   |             | Reaching reflex   |  |  |  |  |  |  |  |  |  |  |  |  |  |  |  |  |  |  |  |  |  |
| Autonomous scheme |             | Palpebral closure |  |  |  |  |  |  |  |  |  |  |  |  |  |  |  |  |  |  |  |  |  |
|                   |             | Salivation        |  |  |  |  |  |  |  |  |  |  |  |  |  |  |  |  |  |  |  |  |  |
|                   |             | Piloerection      |  |  |  |  |  |  |  |  |  |  |  |  |  |  |  |  |  |  |  |  |  |
|                   |             | Hypothermia       |  |  |  |  |  |  |  |  |  |  |  |  |  |  |  |  |  |  |  |  |  |
|                   |             | Respiration rate  |  |  |  |  |  |  |  |  |  |  |  |  |  |  |  |  |  |  |  |  |  |

Figure S16: Irwin test for the acetone extract of *M. mexicana* A. Juss. Leaves (MmAE).  
 += low, ++= medium, +++= high.
